# Supplementary material for: Does Vancomycin Wrapping in Anterior Cruciate Ligament Reconstruction Affect Tenocyte Activity In Vitro?
Source: MDPI journal article supplement (doi:10.3390/antibiotics10091087), 2021-09-08
Supplement: s1 [file s1]

Article

# Does Vancomycin Wrapping in Anterior Cruciate Ligament Reconstruction Affect Tenocyte Activity in Vitro?

Rocco Papalia †, Claudia Cicone †, Fabrizio Russo, Luca Ambrosio, Giuseppina Di Giacomo, Gianluca Vadalà \* and Vincenzo Denaro

Laboratory of Regenerative Orthopaedics, Department of Orthopaedic and Trauma Surgery, Campus BioMedico University of Rome, Rome, 00128, Italy; r.papalia@unicampus.it (R.P.); c.cicone@unicampus.it (C.C.); fabrizio.russo@unicampus.it (F.R.); l.ambrosio@unicampus.it (L.A.); g.digiaco@unicampus.it (G.D.G.); denaro@unicampus.it (V.D.)

\* Correspondence: g.vadala@unicampus.it

† The authors equally contributed to the work

## Supplementary Materials

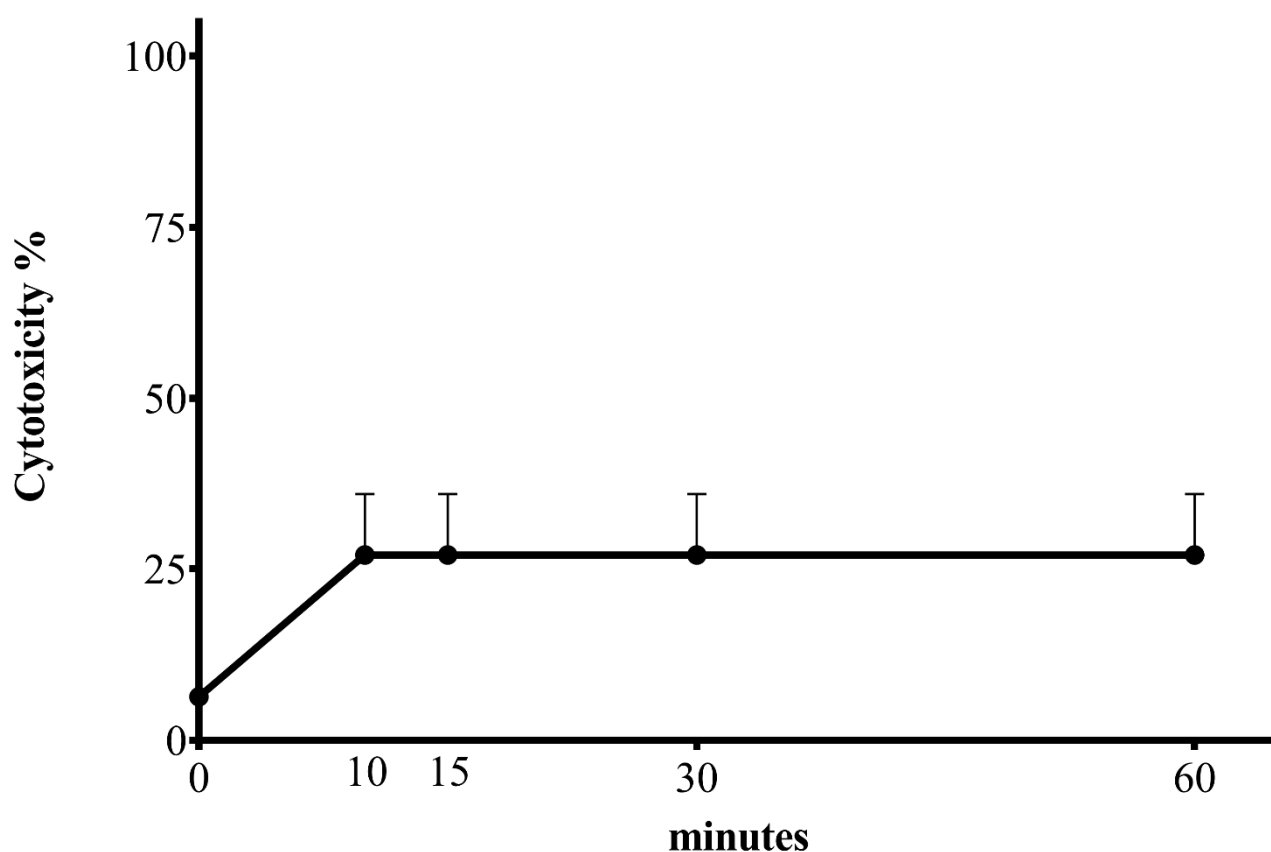

**Figure S1.** Cytotoxicity dose time-curve of hTCs treated with 0 mg/mL vancomycin (saline only) comparing cells cultured in DMEM as a baseline of 100%.

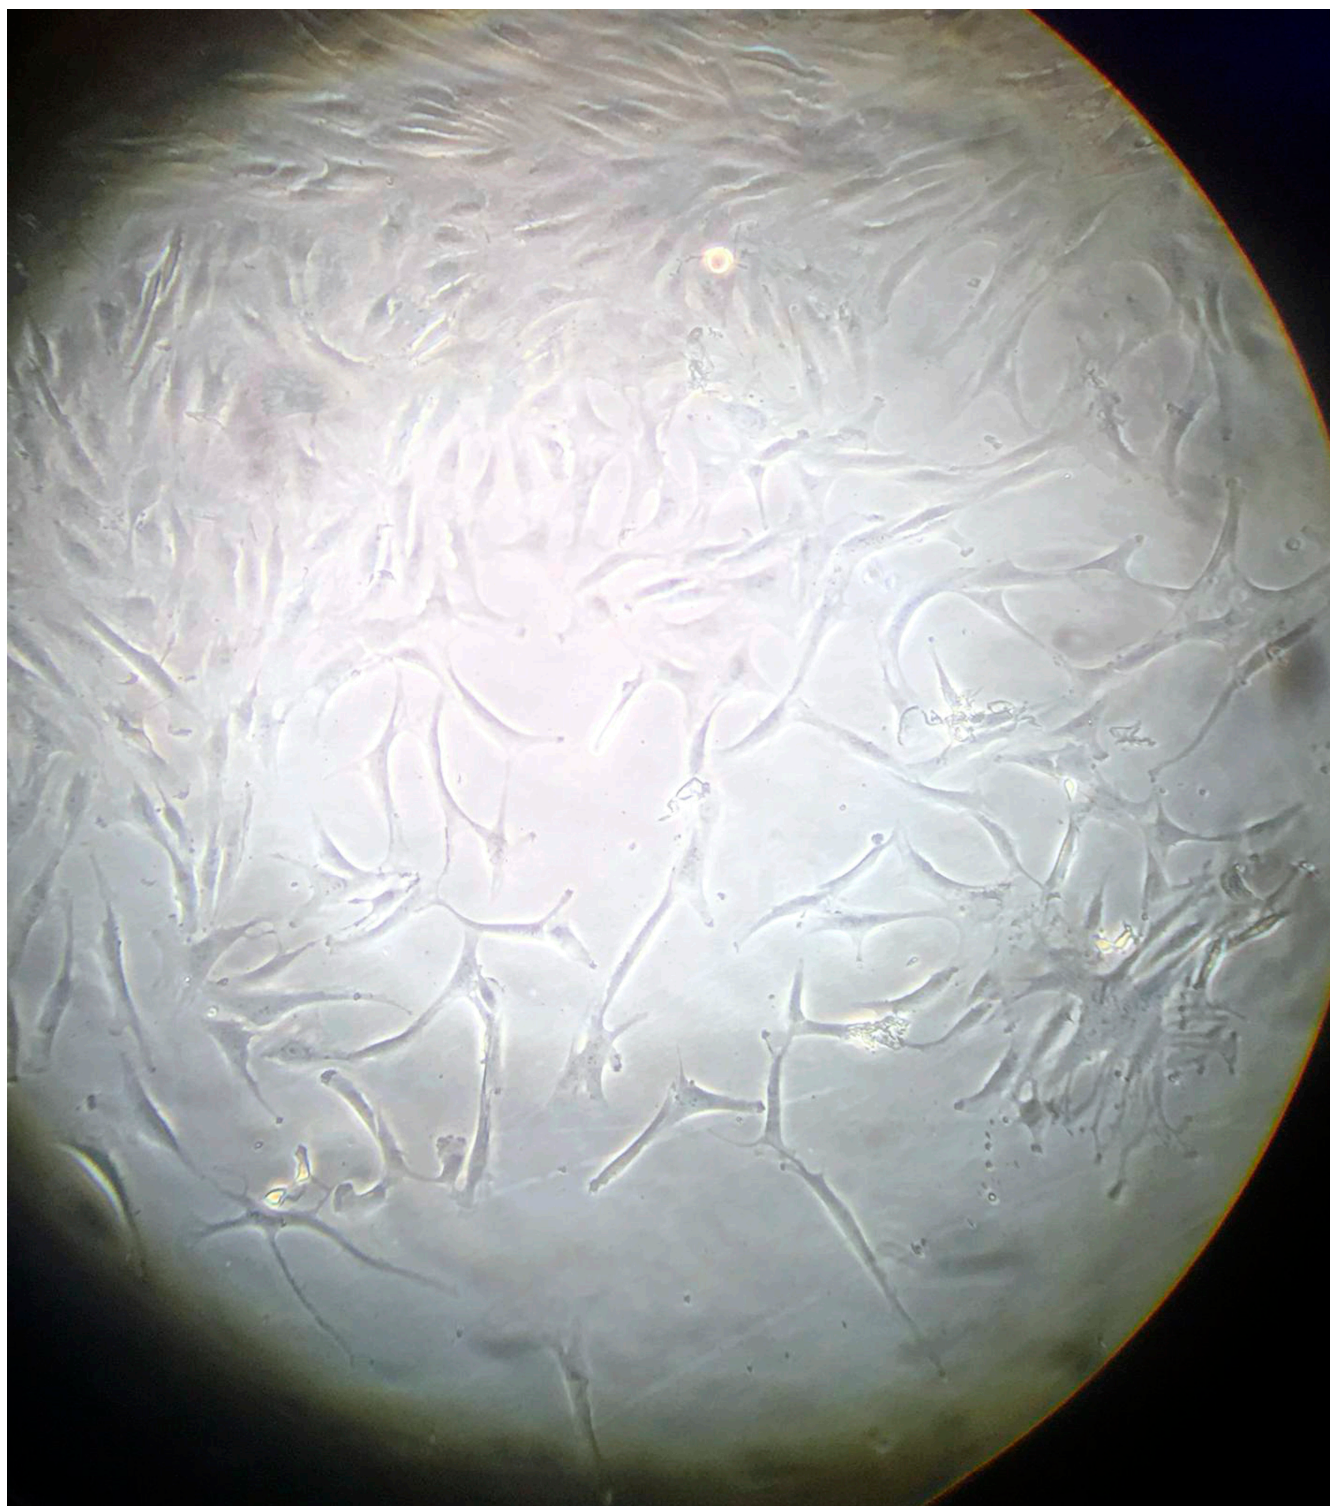



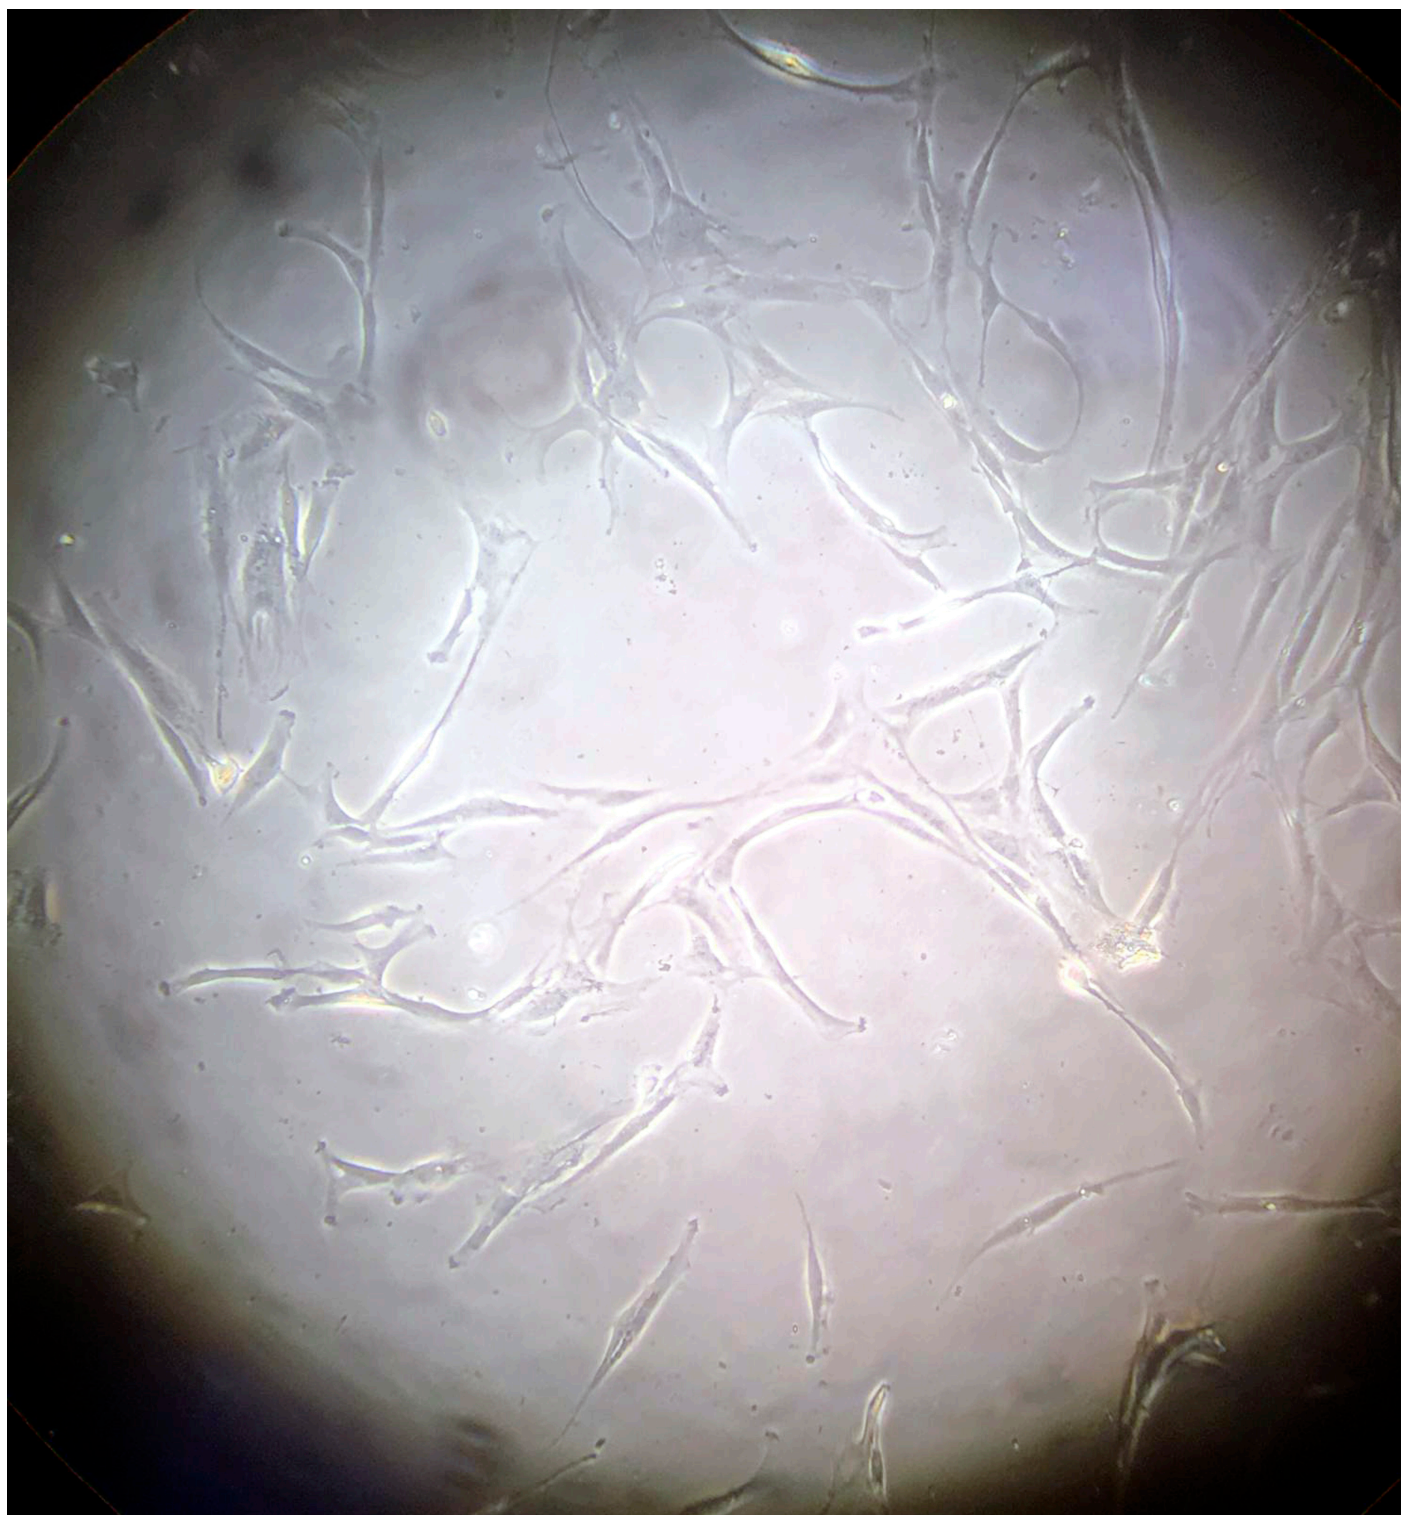

**Figure S2.** Microscopic representative images showing hTCs in culture.
